# Supplementary material for: The type VI secretion system protein AsaA in Acinetobacter baumannii is a periplasmic protein physically interacting with TssM and required for T6SS assembly
Source: PubMed Central journal article supplement (PMC6602968; doi:10.1038/s41598-019-45875-9), 2019-07-01
Supplement: 41598_2019_45875_MOESM1_ESM.pdf [file 41598_2019_45875_MOESM1_ESM.pdf]

## Supplementary information

Title: The type VI secretion system protein AsaA in *Acinetobacter baumannii* is a periplasmic protein physically interacting with TssM and required for T6SS assembly

Authors: Lei Li, Yi-Nuo Wang, Hong-Bing Jia, Ping Wang, Jun-Fang Dong, Juan Deng, Feng-Min Lu & Qing-Hua Zou

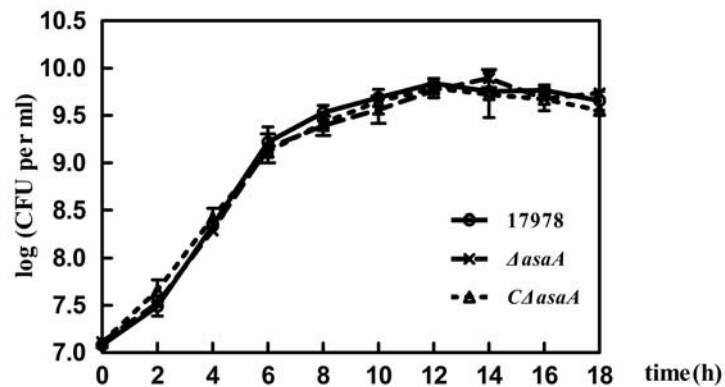

**Supplementary Figure 1.** *A. baumannii* strains growth curve in LB medium. The wild type 17978, *AsaA* mutant and complementation strains were used to inoculate LB medium at  $10^7$  CFU per ml. Samples were taken in triplicate at intervals of 2 h, diluted and plated on LB plates. Bacterial CFU were counted after incubation for 2 days. The experiments were repeated twice with similar results, and one representative result is presented.

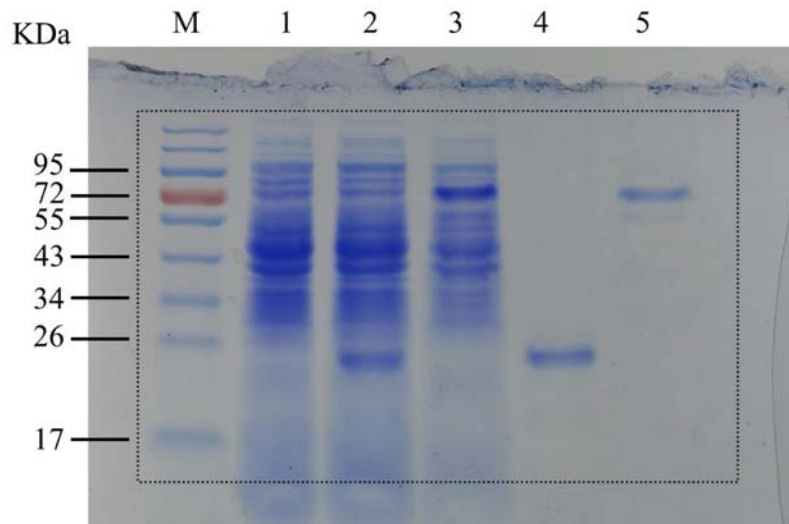

**Supplementary Figure 2.** The full-length gel of His<sub>6</sub>-tagged fusion proteins were over expressed and purified. Lanes: 1, crude BL21/pET30a extract; 2, crude BL21/pET30a-AsaA extract induced with IPTG; 3, crude BL21/pET30a-TssM<sub>436-1041</sub> extract induced with IPTG; 4, affinity-purified His<sub>6</sub>-AsaA protein; 5, affinity-purified His<sub>6</sub>-TssM<sub>436-1041</sub> protein; M, molecular mass marker. Inside the box is the figure 4B.

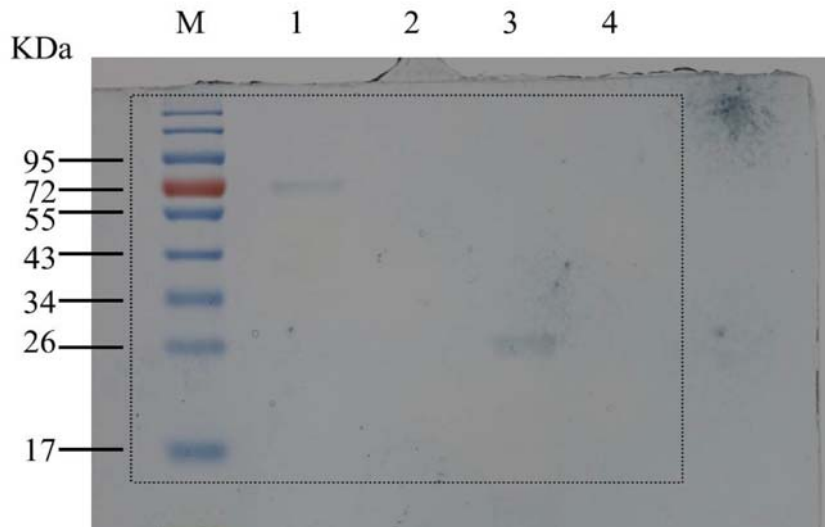

**Supplementary Figure 3.** The full-length gel of Pull-down assays. Lanes: 1, pull-down of His<sub>6</sub>-TssM by immobilized His<sub>6</sub>-AsaA; 2, His<sub>6</sub>-TssM mixed with streptavidin sepharose beads(negative control); 3, pull-down of His<sub>6</sub>-AsaA by immobilized His<sub>6</sub>-TssM; 4, His<sub>6</sub>-AsaA mixed with streptavidin sepharose beads(negative control) ; M, molecular mass marker. Inside the box is the figure 4C.

**Table S1. Strains and plasmids used in this study**

| Strains or plasmids                | Relevant characteristics                                                                                                                                                                          | Reference or source |
|------------------------------------|---------------------------------------------------------------------------------------------------------------------------------------------------------------------------------------------------|---------------------|
| <i>E. coli</i> strains             |                                                                                                                                                                                                   |                     |
| JM109                              | <i>RecA1, endA1, gyrA96, thi, supE44, relA1</i> $\Delta$ ( <i>lac-proAB</i> )/F' [ <i>traD36, lac<sup>q</sup>, lacZ</i> $\Delta$ M15]                                                             | [1]                 |
| JM109/pk18 <i>mob</i>              | JM109 harboring recombinant plasmid pk18 <i>mob</i> , Kan <sup>r</sup>                                                                                                                            | This work           |
| BL21(DE3)                          | F <sup>-</sup> <i>ompT gal dcm lon hsdS<sub>B</sub> (r<sup>-</sup>g<sup>-</sup>m<sup>-</sup>b)</i> $\lambda$ (DE3)                                                                                | Novagen,Germany     |
| BL21/ pET30a                       | BL21(DE3) harboring plasmid pET30a, Kan <sup>r</sup>                                                                                                                                              | This work           |
| BL21/pET30a-AsaA                   | BL21(DE3) harboring plasmid pET30a-AsaA, Kan <sup>r</sup>                                                                                                                                         | This work           |
| BL21/pET30a-TssM <sub>34-370</sub> | BL21(DE3) harboring plasmid pET30a-TssM <sub>34-370</sub> , Kan <sup>r</sup>                                                                                                                      | This work           |
| XL1-Blue MRF'                      | Reporter strain, $\Delta$ ( <i>mcrA</i> )183 $\Delta$ ( <i>mcrCB-hsdSMR-mrr</i> )173 <i>endA1 hisB sup E44 thi1 recA1 gyrA96relA1 lac</i> [F' <i>lac<sup>q</sup> HIS3 aadA</i> Kan <sup>r</sup> ] | Stratagene          |
| X/pBA-pTB                          | XL1-Blue MRF' harboring plasmid pBA and pTB, Kan <sup>r</sup> Tc <sup>r</sup> Cm <sup>r</sup>                                                                                                     | This work           |

|                                                   |                                                                                                                                       |           |
|---------------------------------------------------|---------------------------------------------------------------------------------------------------------------------------------------|-----------|
| X/pBA-pTL                                         | XL1-Blue MRF' harboring plasmid pBA and pTL, Kan <sup>r</sup> Tc <sup>r</sup> Cm <sup>r</sup>                                         | This work |
| X/pBA-pTM <sub>1303</sub>                         | XL1-Blue MRF' harboring plasmid pBA and pTM <sub>1303</sub> , Kan <sup>r</sup> Tc <sup>r</sup> Cm <sup>r</sup>                        | This work |
| X/pBA-pTM <sub>33-415</sub>                       | XL1-Blue MRF' harboring plasmid pBA and pTM <sub>33-415</sub> , Kan <sup>r</sup> Tc <sup>r</sup> Cm <sup>r</sup>                      | This work |
| X/pBA-pTM <sub>436-1041</sub>                     | XL1-Blue MRF' harboring plasmid pBA and pTM <sub>436-1041</sub> , Kan <sup>r</sup> Tc <sup>r</sup> Cm <sup>r</sup>                    | This work |
| X/pBA-pT                                          | XL1-Blue MRF' harboring plasmid pBA and pTRG, Kan <sup>r</sup> Tc <sup>r</sup> Cm <sup>r</sup>                                        | This work |
| X/pB-pTM <sub>436-1041</sub>                      | XL1-Blue MRF' harboring plasmid pBT and pTM <sub>436-1041</sub> , Kan <sup>r</sup> Tc <sup>r</sup> Cm <sup>r</sup>                    | This work |
| X/pBhpaM-pThrcJ                                   | XL1-Blue MRF' harboring plasmid pBhpaM and pThrcJ, Kan <sup>r</sup> Tc <sup>r</sup> Cm <sup>r</sup>                                   | [2]       |
| X/pBA <sub>25-70</sub> -pTM <sub>436-1041</sub>   | XL1-Blue MRF' harboring plasmid pBA <sub>25-70</sub> and pTM <sub>436-1041</sub> , Kan <sup>r</sup> Tc <sup>r</sup> Cm <sup>r</sup>   | This work |
| X/pBA <sub>25-110</sub> -pTM <sub>436-1041</sub>  | XL1-Blue MRF' harboring plasmid pBA <sub>25-110</sub> and pTM <sub>436-1041</sub> , Kan <sup>r</sup> Tc <sup>r</sup> Cm <sup>r</sup>  | This work |
| X/pBA <sub>25-150</sub> -pTM <sub>436-1041</sub>  | XL1-Blue MRF' harboring plasmid pBA <sub>25-150</sub> and pTM <sub>436-1041</sub> , Kan <sup>r</sup> Tc <sup>r</sup> Cm <sup>r</sup>  | This work |
| X/pBA <sub>25-190</sub> -pTM <sub>436-1041</sub>  | XL1-Blue MRF' harboring plasmid pBA <sub>25-190</sub> and pTM <sub>436-1041</sub> , Kan <sup>r</sup> Tc <sup>r</sup> Cm <sup>r</sup>  | This work |
| X/pBA <sub>25-230</sub> -pTM <sub>436-1041</sub>  | XL1-Blue MRF' harboring plasmid pBA <sub>25-230</sub> and pTM <sub>436-1041</sub> , Kan <sup>r</sup> Tc <sup>r</sup> Cm <sup>r</sup>  | This work |
| X/pBA <sub>110-230</sub> -pTM <sub>436-1041</sub> | XL1-Blue MRF' harboring plasmid pBA <sub>110-230</sub> and pTM <sub>436-1041</sub> , Kan <sup>r</sup> Tc <sup>r</sup> Cm <sup>r</sup> | This work |
| X/pBA <sub>150-230</sub> -pTM <sub>436-1041</sub> | XL1-Blue MRF' harboring plasmid pBA <sub>150-230</sub> and pTM <sub>436-1041</sub> , Kan <sup>r</sup> Tc <sup>r</sup> Cm <sup>r</sup> | This work |
| X/pBA <sub>190-230</sub> -pTM <sub>436-1041</sub> | XL1-Blue MRF' harboring plasmid pBA <sub>190-230</sub> and pTM <sub>436-1041</sub> , Kan <sup>r</sup> Tc <sup>r</sup> Cm <sup>r</sup> | This work |
| X/pBA <sub>70-150</sub> -pTM <sub>436-1041</sub>  | XL1-Blue MRF' harboring plasmid pBA <sub>70-150</sub> and pTM <sub>436-1041</sub> , Kan <sup>r</sup> Tc <sup>r</sup> Cm <sup>r</sup>  | This work |
| X/pBA <sub>70-110</sub> -pTM <sub>436-1041</sub>  | XL1-Blue MRF' harboring plasmid pBA <sub>70-110</sub> and pTM <sub>436-1041</sub> , Kan <sup>r</sup> Tc <sup>r</sup> Cm <sup>r</sup>  | This work |
| X/pBA <sub>110-150</sub> -pTM <sub>436-1041</sub> | XL1-Blue MRF' harboring plasmid pBA <sub>110-150</sub> and pTM <sub>436-1041</sub> , Kan <sup>r</sup> Tc <sup>r</sup> Cm <sup>r</sup> | This work |

#### A. *Baumannii* strains

|                         |                                                                                 |           |
|-------------------------|---------------------------------------------------------------------------------|-----------|
| 17978                   | wild type strain                                                                | [3]       |
| <i>ΔasaA</i>            | As 17978, but <i>asaA</i> gene ( <i>AIS_1292</i> ) deleted.                     | This work |
| <i>ΔtssM</i>            | As 17978, but <i>tssM</i> gene ( <i>AIS_1302</i> ) deleted.                     | This work |
| <i>ΔΔasaA</i>           | <i>ΔasaA</i> harboring the recombinant plasmid pTrc99AasaA , Amp <sup>r</sup>   | This work |
| 17978/pThcpH6           | 17978 harboring recombinant plasmid pTHcpH6, Amp <sup>r</sup>                   | This work |
| <i>ΔasaA</i> /pThcpH6   | <i>ΔasaA</i> harboring recombinant plasmid pTHcpH6, Amp <sup>r</sup>            | This work |
| <i>ΔtssM</i> /pThcpH6   | <i>ΔtssM</i> harboring recombinant plasmid pTHcpH6, Amp <sup>r</sup>            | This work |
| <i>ΔasaA</i> / pTasaAH6 | <i>ΔasaA</i> harboring the recombinant plasmid pTrc99AasaAH6 , Amp <sup>r</sup> | This work |
| 17978/pTpglCH6          | 17978 harboring recombinant plasmid pTpglCH6, Amp <sup>r</sup>                  | This work |
| 17978/pTompAH6          | 17978 harboring recombinant plasmid pTompA H6, Amp <sup>r</sup>                 | This work |
| 17978/pTdsbAH6          | 17978 harboring recombinant plasmid pTdsbAH6, Amp <sup>r</sup>                  | This work |

#### Plasmids

|                                  |                                                                                                                                                             |           |
|----------------------------------|-------------------------------------------------------------------------------------------------------------------------------------------------------------|-----------|
| pET30a                           | Expression vector, allow the production of fusion proteins containing amino terminal 6×His -tagged sequences. Kan <sup>r</sup>                              | Novagen   |
| pET30a-AsaA                      | pET30a containing a 618-bp fragment of partial <i>asaA</i> gene sequence encoding the 25 <sup>th</sup> –230 <sup>th</sup> amino acids. Kan <sup>r</sup>     | This work |
| pET30a- TssM <sub>436-1041</sub> | pET-30a containing a 1818-bp fragment of partial <i>tssM</i> gene sequence encoding the 436 <sup>th</sup> –1041 <sup>th</sup> amino acids. Kan <sup>r</sup> | This work |
| pTrc99A                          | <i>Ptrc</i> , pBR322ori, <i>rrnB</i> T1, <i>rrnB</i> T2, <i>lac</i> <sup>iq</sup> , <i>bla</i> , template for <i>Ptrc</i> Promoter, Amp <sup>r</sup>        | [4]       |
| pThcpH6                          | pTrc99A containing the encoding sequence of Hcp with 6×His tag in its C-terminus, Amp <sup>r</sup>                                                          | This work |

|                         |                                                                                                                                                        |            |
|-------------------------|--------------------------------------------------------------------------------------------------------------------------------------------------------|------------|
| pTasaAH6                | pTrc99A containing the encoding sequence of AsaA with 6×His tag in its C-terminus, Amp <sup>r</sup>                                                    | This work  |
| pTpglCH6                | pTrc99A containing the encoding sequence of PglC with 6×His tag in its C-terminus, Amp <sup>r</sup>                                                    | This work  |
| pTompAH6                | pTrc99A containing the encoding sequence of OmpA with 6×His tag in its C-terminus, Amp <sup>r</sup>                                                    | This work  |
| pTdsbAH6                | pTrc99A containing the encoding sequence of DsbA with 6×His tag in its C-terminus, Amp <sup>r</sup>                                                    | This work  |
| pBT                     | Two-hybrid system bait plasmid containing the <i>cm</i> gene, p15A origin of replication and $\lambda$ cI ORF, Cm <sup>r</sup>                         | Stratagene |
| pBA                     | pBT derivative carrying a 621-bp fragment encoding the 25 <sup>th</sup> –230 <sup>th</sup> amino acids of AsaA, Cm <sup>r</sup>                        | This work  |
| pBA <sub>25-70</sub>    | pBT derivative carrying a 138-bp fragment encoding the 25 <sup>th</sup> –70 <sup>th</sup> amino acids of AsaA, Cm <sup>r</sup>                         | This work  |
| pBA <sub>25-110</sub>   | pBT derivative carrying a 258-bp fragment encoding the 25 <sup>th</sup> –110 <sup>th</sup> amino acids of AsaA, Cm <sup>r</sup>                        | This work  |
| pBA <sub>25-150</sub>   | pBT derivative carrying a 378-bp fragment encoding the 25 <sup>th</sup> –150 <sup>th</sup> amino acids of AsaA, Cm <sup>r</sup>                        | This work  |
| pBA <sub>25-190</sub>   | pBT derivative carrying a 498-bp fragment encoding the 25 <sup>th</sup> –190 <sup>th</sup> amino acids of AsaA, Cm <sup>r</sup>                        | This work  |
| pBA <sub>70-230</sub>   | pBT derivative carrying a 483-bp fragment encoding the 70 <sup>th</sup> –230 <sup>th</sup> amino acids of AsaA, Cm <sup>r</sup>                        | This work  |
| pBA <sub>110-230</sub>  | pBT derivative carrying a 363-bp fragment encoding the 110 <sup>th</sup> –230 <sup>th</sup> amino acids of AsaA, Cm <sup>r</sup>                       | This work  |
| pBA <sub>150-230</sub>  | pBT derivative carrying a 243-bp fragment encoding the 150 <sup>th</sup> –230 <sup>th</sup> amino acids of AsaA, Cm <sup>r</sup>                       | This work  |
| pBA <sub>190-230</sub>  | pBT derivative carrying a 123-bp fragment encoding the 190 <sup>th</sup> –230 <sup>th</sup> amino acids of AsaA, Cm <sup>r</sup>                       | This work  |
| pBA <sub>70-150</sub>   | pBT derivative carrying a 243-bp fragment encoding the 70 <sup>th</sup> –150 <sup>th</sup> amino acids of AsaA, Cm <sup>r</sup>                        | This work  |
| pBA <sub>70-110</sub>   | pBT derivative carrying a 123-bp fragment encoding the 70 <sup>th</sup> –110 <sup>th</sup> amino acids of AsaA, Cm <sup>r</sup>                        | This work  |
| pBA <sub>110-150</sub>  | pBT derivative carrying a 123-bp fragment encoding the 110 <sup>th</sup> –150 <sup>th</sup> amino acids of AsaA, Cm <sup>r</sup>                       | This work  |
| pTRG                    | Two-hybrid system target plasmid containing the <i>tet</i> gene, ColE1 origin of replication, and RNA polymerase $\alpha$ subunit ORF, Tc <sup>r</sup> | Stratagene |
| pTB                     | pTRG derivative carrying the 150-bp of <i>tssB</i> gene, Tc <sup>r</sup>                                                                               | This work  |
| pTL                     | pTRG derivative carrying the 648-bp of <i>tssL</i> gene, Tc <sup>r</sup>                                                                               | This work  |
| pTM <sub>1303</sub>     | pTRG derivative carrying the 567-bp of <i>AIS_1303</i> gene, Tc <sup>r</sup>                                                                           | This work  |
| pTM <sub>33-415</sub>   | pTRG derivative carrying a 1149-bp fragment encoding the 33 <sup>th</sup> –415 <sup>th</sup> amino acids of <i>tssM</i> gene, Tc <sup>r</sup>          | This work  |
| pTM <sub>436-1041</sub> | pTRG derivative carrying a 1818-bp fragment encoding the 436 <sup>th</sup> –1041 <sup>th</sup> amino acids of <i>tssM</i> gene, Tc <sup>r</sup>        | This work  |

## References

1. Yanisch-Perron, C., Vieira, J. & Messing, J. Improved M13 phage cloning vectors and host strains: nucleotide sequences of the M13mp18 and pUC19 vectors. *Gene* **33**, 103–119(1985).
2. Li, L., Li, R. F., Ming, Z. H., Lu, G. T. & Tang, J. L. Identification of a novel type III



|                   |                               |                                                                                                                                                                                            |
|-------------------|-------------------------------|--------------------------------------------------------------------------------------------------------------------------------------------------------------------------------------------|
| <i>tssB</i> -F    | CCGGATCCGTTTCAGACTTACATAT     | 150-bp DNA fragment of the <i>tssB</i> ORF sequence. Used for bacterial two-hybrid assay.                                                                                                  |
| <i>tssB</i> -R    | AAGAAATTCCTAAATCGACATTAATGA   |                                                                                                                                                                                            |
| <i>tssL</i> -F    | CCGGATCCATGTCACAATCTACAGGT    | 648-bp DNA fragment spans nucleotides 1 to 648 bp of the <i>tssM</i> coding sequence, encoding the 1 <sup>th</sup> - 216 <sup>th</sup> amino acids. Used for bacterial two-hybrid assay.   |
| <i>tssL</i> -R    | AAGAAATTCAGGTAGCTCACGATGGAT   |                                                                                                                                                                                            |
| <i>Tss1303</i> -F | CCGGATCCATGGCAACAGGTGAGTTA    | 567-bp DNA fragment of the <i>AIS_1303</i> ORF sequence. Used for bacterial two-hybrid assay.                                                                                              |
| <i>Tss1303</i> -R | AAGAAATTCATGGCTTAACTCCCGC     |                                                                                                                                                                                            |
| <i>asaA</i> -OF   | AAGGATCCCAAGCAGCAGAACTAGAG    | 621-bp DNA fragment spans nucleotides 73 to 693 bp of the <i>asaA</i> coding sequence, encoding the 25 <sup>th</sup> - 230 <sup>th</sup> amino acids. Used for pull-down assay.            |
| <i>asaA</i> -OR   | CGAAGCTTTTATTTAATTAAGGGGTC    |                                                                                                                                                                                            |
| <i>tssM</i> -OF   | AAGGATCCTCATATCGTAACAATCAA    | 1821-bp DNA fragment spans nucleotides 1306 to 3126 bp of the <i>tssM</i> coding sequence, encoding the 436 <sup>th</sup> - 1041 <sup>th</sup> amino acids. Used for pull-down assay.      |
| <i>tssM</i> -OR   | CCGTCGACTTAAACTAATCCCCAAATCTT |                                                                                                                                                                                            |
| <i>asaA</i> -1F   | CCGAATTCACAAGCAGCAGAACTAGAG   | 621-bp DNA fragment spans nucleotides 73 to 693 bp of the <i>asaA</i> coding sequence, encoding the 25 <sup>th</sup> - 230 <sup>th</sup> amino acids. Used for bacterial two-hybrid assay. |
| <i>asaA</i> -1R   | AAGGATCCCTTATTTAATTAAGGGGTC   |                                                                                                                                                                                            |
| <i>asaA</i> -2F   | CCGAATTCACAAGCAGCAGAACTAGAG   | 138-bp DNA fragment spans nucleotides 73 to 210 bp of the <i>asaA</i> coding sequence, encoding the 25 <sup>th</sup> - 70 <sup>th</sup> amino acids. Used for bacterial two-hybrid assay.  |
| <i>asaA</i> -2R   | AAGGATCCATTTTTTTGAGTTGTATT    |                                                                                                                                                                                            |
| <i>asaA</i> -3F   | CCGAATTCACAAGCAGCAGAACTAGAG   | 258-bp DNA fragment spans nucleotides 73 to 330 bp of the <i>asaA</i> ORF sequence, encoding the 25 <sup>th</sup> - 110 <sup>th</sup> amino acids. Used for bacterial two-hybrid assay.    |
| <i>asaA</i> -3R   | AAGGATCCTAAGACATCTGTGATTAA    |                                                                                                                                                                                            |
| <i>asaA</i> -4F   | CCGAATTCACAAGCAGCAGAACTAGAG   | 378-bp DNA fragment spans nucleotides 73 to 450 bp of the <i>asaA</i> ORF sequence, encoding the 25 <sup>th</sup> - 150 <sup>th</sup> amino acids. Used for bacterial two-hybrid assay.    |
| <i>asaA</i> -4R   | AAGGATCCATGAATATTTTCAACTAA    |                                                                                                                                                                                            |
| <i>asaA</i> -5F   | CCGAATTCACAAGCAGCAGAACTAGAG   | 498-bp DNA fragment spans nucleotides 73 to 570 bp of the <i>asaA</i> ORF sequence, encoding the 25 <sup>th</sup> - 190 <sup>th</sup> amino acids. Used for bacterial two-hybrid assay.    |
| <i>asaA</i> -5R   | AAGGATCCAGCACTCACTTTATTACG    |                                                                                                                                                                                            |
| <i>asaA</i> -6F   | CCGAATTCATCTAGAACATCAAATAAA   | 123-bp DNA fragment spans nucleotides 571 to 693 bp of the <i>asaA</i> ORF sequence, encoding the 190 <sup>th</sup> - 230 <sup>th</sup> amino acids. Used for bacterial two-hybrid assay.  |
| <i>asaA</i> -6R   | AAGGATCCCTTATTTAATTAAGGGGTC   |                                                                                                                                                                                            |
| <i>asaA</i> -7F   | CCGAATTCAACTGCAATGCCGGCTCCT   | 243-bp DNA fragment spans nucleotides 451 to 693 bp of the <i>asaA</i> ORF sequence, encoding the 150 <sup>th</sup> - 230 <sup>th</sup> amino acids. Used for bacterial two-hybrid assay.  |
| <i>asaA</i> -7R   | AAGGATCCCTTATTTAATTAAGGGGTC   |                                                                                                                                                                                            |
| <i>asaA</i> -8F   | CCGAATTCATTTTTATCTGGTGTGAGC   | 363-bp DNA fragment spans nucleotides 331 to 693 bp of the <i>asaA</i> ORF sequence, encoding the 110 <sup>th</sup> - 230 <sup>th</sup> amino acids. Used for bacterial two-hybrid assay.  |
| <i>asaA</i> -8R   | AAGGATCCCTTATTTAATTAAGGGGTC   |                                                                                                                                                                                            |
| <i>asaA</i> -9F   | CCGAATTCAGATTATTAGCTAAAGCT    | 483-bp DNA fragment spans nucleotides 211 to 693 bp of the <i>asaA</i> ORF sequence, encoding the 70 <sup>th</sup> - 230 <sup>th</sup> amino acids. Used for bacterial two-hybrid assay.   |
| <i>asaA</i> -9R   | AAGGATCCCTTATTTAATTAAGGGGTC   |                                                                                                                                                                                            |
| <i>asaA</i> -10F  | CCGAATTCAGATTATTAGCTAAAGCT    | 240-bp DNA fragment spans nucleotides 211 to 450 bp of the <i>asaA</i> ORF sequence, encoding the 70 <sup>th</sup> - 150 <sup>th</sup> amino acids. Used for bacterial two-hybrid assay.   |
| <i>asaA</i> -10R  | AAGGATCCATGAATATTTTCAACTAA    |                                                                                                                                                                                            |
| <i>asaA</i> -11F  | CCGAATTCAGATTATTAGCTAAAGCT    | 120-bp DNA fragment spans nucleotides 211 to 330 bp of the <i>asaA</i> ORF sequence, encoding the 70 <sup>th</sup> - 110 <sup>th</sup> amino acids. Used for bacterial two-hybrid assay.   |
| <i>asaA</i> -11R  | AAGGATCCCTAAGACATCTGTGATTAA   |                                                                                                                                                                                            |

|                  |                                    |                                                                                                                                                                                          |
|------------------|------------------------------------|------------------------------------------------------------------------------------------------------------------------------------------------------------------------------------------|
| <i>asaA</i> -12F | <u>CCGAATTC</u> ATTTTATCTGGTGTGAGC | 120-bp DNA fragment spans nucleotides 331 to 450 bp of the <i>asaA</i> ORF sequence, encoding the 110 <sup>th</sup> -150 <sup>th</sup> amino acids. Used for bacterial two-hybrid assay. |
| <i>asaA</i> -12R | AAGGATCCATGAATATTTTCAACTAA         |                                                                                                                                                                                          |

The underlined sequences indicate the restriction sites for *EcoRI*, *HindIII*, *SalI*, *XbaI* and *BamHI*, respectively.

**Table S3. AsaA homologues in the family *Moraxellaceae***

| Species                                   | Gene                  | Signal peptide                       | Length (aa) | Identity(%)/similarity(%) | Function predicted        | Sequence Types (ST) | Reference            |
|-------------------------------------------|-----------------------|--------------------------------------|-------------|---------------------------|---------------------------|---------------------|----------------------|
| <i>Acinetobacter baumannii</i> AC29       | <i>BL01_13280</i>     | 1 <sup>th</sup> -24 <sup>th</sup> aa | 230         | 100/100                   | signal peptide protein    | 195                 | [1]                  |
| <i>Acinetobacter baumannii</i> BJAB0868   | <i>BJAB0868_01408</i> | 1 <sup>th</sup> -24 <sup>th</sup> aa | 230         | 100/100                   | hypothetical protein      | 218                 | [2]                  |
| <i>Acinetobacter baumannii</i> 1656-2     | <i>ABK1_1741</i>      | 1 <sup>th</sup> -24 <sup>th</sup> aa | 230         | 100/100                   | putative exported protein | 423                 | [3]                  |
| <i>Acinetobacter baumannii</i> AB307-0294 | <i>ABBFA_002240</i>   | 1 <sup>th</sup> -24 <sup>th</sup> aa | 230         | 99.6/99.6                 | hypothetical protein      | 231                 | [4]                  |
| <i>Acinetobacter baumannii</i> AB0057     | <i>AB57_1478</i>      | 1 <sup>th</sup> -24 <sup>th</sup> aa | 230         | 99.1/99.6                 | hypothetical protein      | 207                 | [4]                  |
| <i>Acinetobacter baumannii</i> BJAB0715   | <i>BJAB0715_01479</i> | 1 <sup>th</sup> -24 <sup>th</sup> aa | 230         | 99.1/99.6                 | hypothetical protein      | 642                 | [5]                  |
| <i>Acinetobacter baumannii</i> AbH12O-A2  | <i>LX00_06400</i>     | 1 <sup>th</sup> -24 <sup>th</sup> aa | 230         | 99.1/99.1                 | signal peptide protein    | 924                 | [6]                  |
| <i>Acinetobacter pittii</i>               | <i>BDGL_000638</i>    | 1 <sup>th</sup> -26 <sup>th</sup> aa | 229         | 90.9/92.6                 | hypothetical protein      | 1527                | [7]                  |
| <i>Acinetobacter calcoaceticus</i>        | <i>BUM88_06735</i>    | 1 <sup>th</sup> -26 <sup>th</sup> aa | 229         | 87.8/92.2                 | hypothetical protein      | 1043                | accession CP020000.1 |
| <i>Acinetobacter nosocomialis</i>         | <i>RR32_11560</i>     | 1 <sup>th</sup> -24 <sup>th</sup> aa | 229         | 80.9/87.8                 | signal peptide protein    | 1162                | accession CP010368.1 |
| <i>Acinetobacter baylyi</i>               | <i>ACIAD2693</i>      | 1 <sup>th</sup> -22 <sup>th</sup> aa | 218         | 43.5/57.8                 | hypothetical protein      |                     | [8]                  |



|                              |             |                                         |     |           |                         |     |
|------------------------------|-------------|-----------------------------------------|-----|-----------|-------------------------|-----|
| <i>Acinetobacter indicus</i> | CTZ23_07445 | 1 <sup>th</sup> -22 <sup>th</sup><br>aa | 222 | 33.3/46.8 | hypothetical<br>protein | [9] |
|------------------------------|-------------|-----------------------------------------|-----|-----------|-------------------------|-----|

Searching the AsaA homologues were carried out by blast the genome sequences in NCBI database with the AsaA sequence. No, no significant similarity protein (similarity>20%) was found within the genome sequence. Signal peptide predictions was carried with the SignalP program. Identity(%) /similarity(%) analysis was performed using the Align X program in Vector NTI software.

## Reference

1. Zhu, L. *et al.* Complete genome analysis of three *Acinetobacter baumannii* clinical isolates in China for insight into the diversification of drug resistance elements. *PLoS One* **8**, e66584(2013).
2. Lean, S. S., Yeo, C. C., Suhaili, Z. & Thong, K. L. Comparative genomics of two ST 195 carbapenem-resistant *Acinetobacter baumannii* with different susceptibility to polymyxin revealed underlying resistance mechanism. *Front Microbiol* **6**, 1445 (2015).
3. Vallenet, D. *et al.* Comparative analysis of *Acinetobacters*: three genomes for three lifestyles. *PLoS One* **3**, e1805 (2008).
4. Merino, M. *et al.* Complete genome sequence of the multiresistant *Acinetobacter baumannii* strain AbH120-A2, isolated during a large outbreak in Spain. *Genome Announc* **2**, e01182-14 (2014).
5. Rogel-Hernandez, M. A. *et al.* Genome sequence of *Acinetobacter lactucae* OTEC-02, isolated from hydrocarbon-contaminated soil. *Genome Announc* **5**, e00400-00417 (2017).
6. Zhan, Y. *et al.* Genome sequence of *Acinetobacter calcoaceticus* PHEA-2, isolated from industry wastewater. *J Bacteriol* **193**, 2672-2673 (2011).
7. Jung, J., Baek, J. H. & Park, W. Complete genome sequence of the diesel-degrading *Acinetobacter* sp. strain DR1. *J Bacteriol* **192**, 4794-4795 (2010).
8. Barbe, V. *et al.* Unique features revealed by the genome sequence of *Acinetobacter* sp. ADP1, a versatile and naturally transformation competent bacterium. *Nucleic Acids Res* **32**, 5766-5779 (2004).
9. Vettath, V. K. *et al.* Complete genome sequence of *Acinetobacter indicus* type strain SGAir0564 isolated from tropical air collected in Singapore. *Genome Announc* **6**, e00230-18 (2018).
10. Daligault, H. E. *et al.* Complete genome assembly of a quality control reference isolate, *Moraxella catarrhalis* strain ATCC 25240. *Genome Announc* **2**, e00938-14 (2014).
11. Moghadam, M. S. *et al.* Isolation and genome sequencing of four arctic marine *Psychrobacter* strains exhibiting multicopper oxidase activity. *BMC Genomics* **17**, 117 (2016).
12. Che, S. *et al.* Complete genome sequence of antarctic bacterium *Psychrobacter* sp. strain G. *Genome Announc* **1**, e00725-13 (2013).
